# Supplementary material for: Synthesis and anticancer activity of the derivatives of marine compound rhizochalin in castration resistant prostate cancer
Source: PubMed Central journal article supplement (PMC5908298; doi:10.18632/oncotarget.24764), 2018-03-30
Supplement: oncotarget-09-16962-s001.pdf [file oncotarget-09-16962-s001.pdf]

# Synthesis and anticancer activity of the derivatives of marine compound rhizochalin in castration resistant prostate cancer

## SUPPLEMENTARY MATERIALS

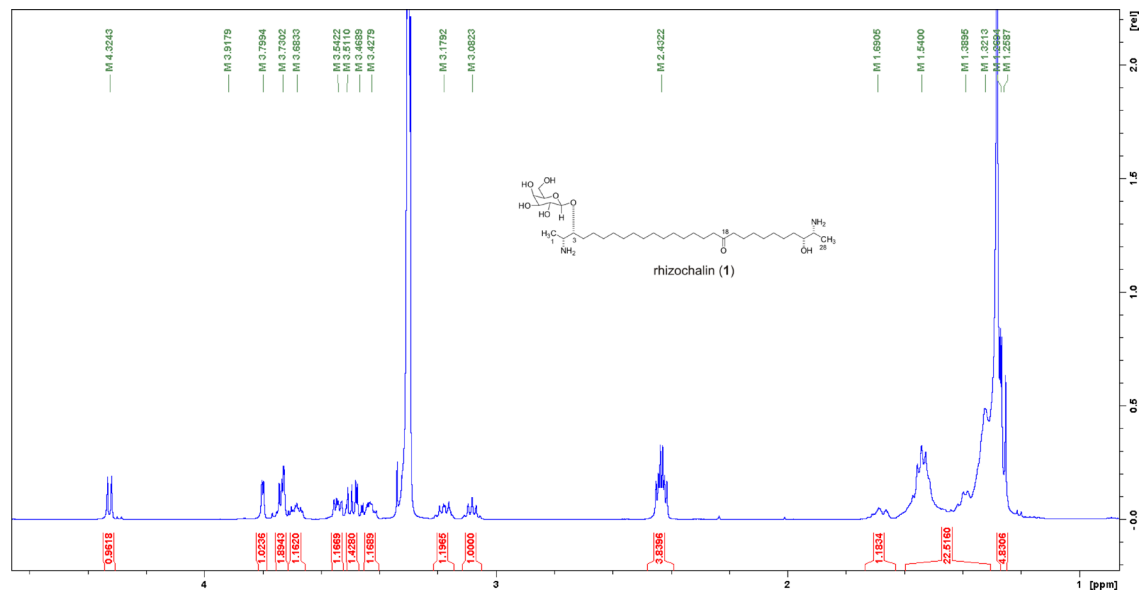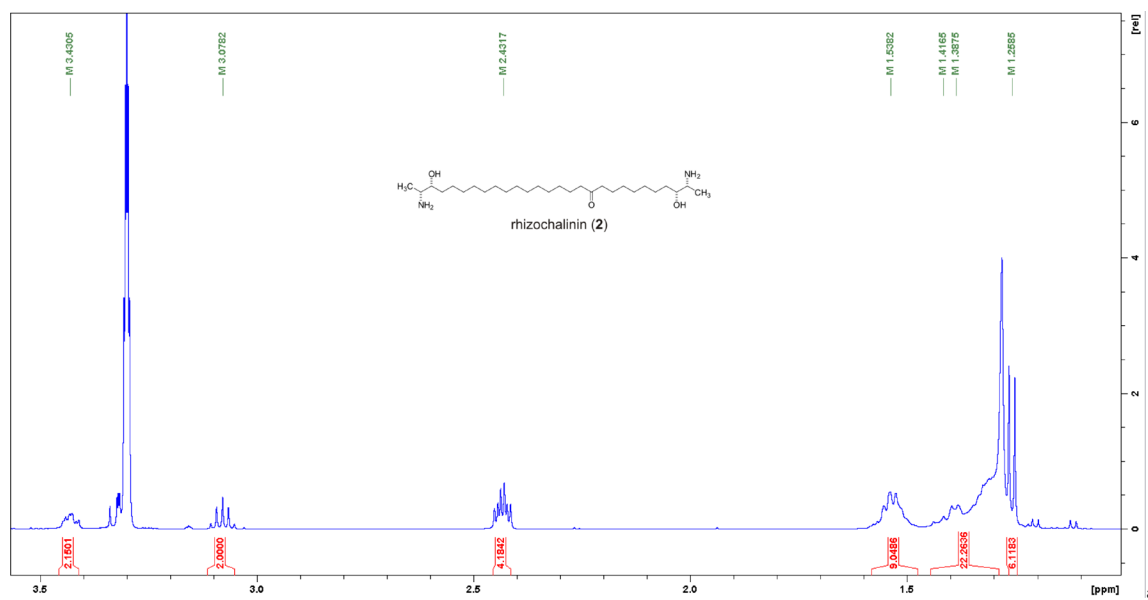

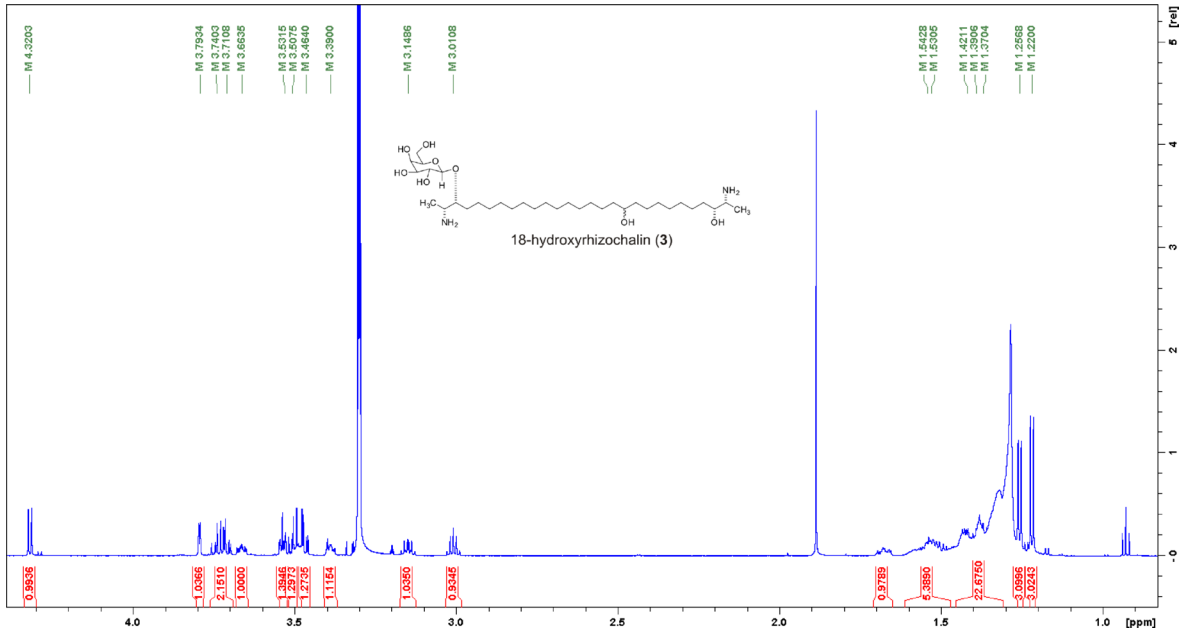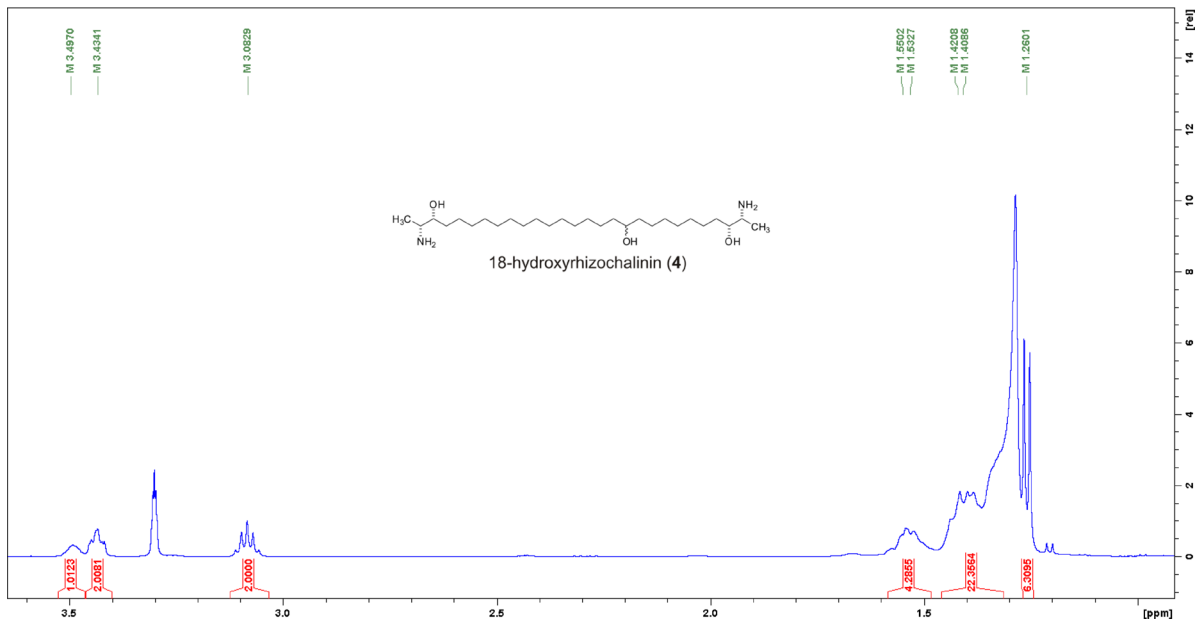

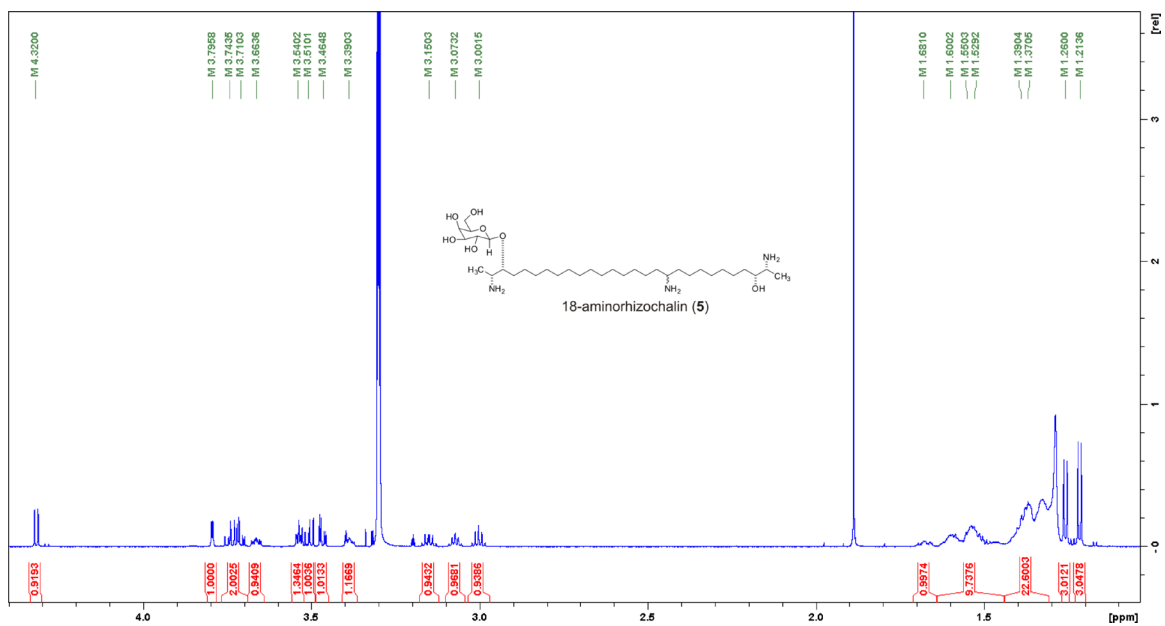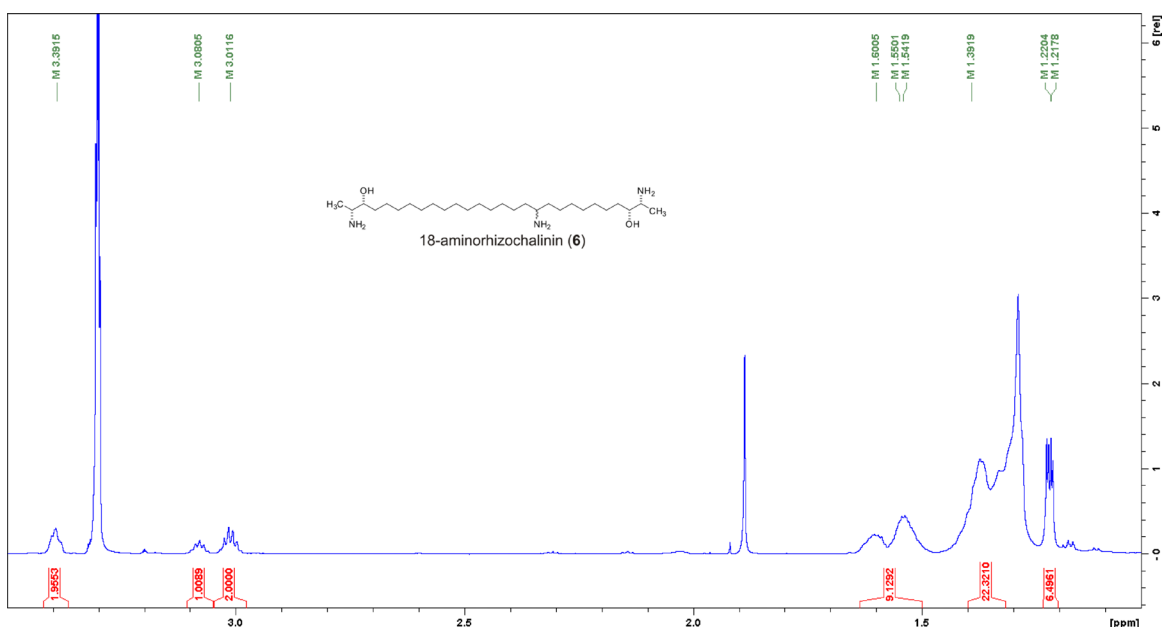

Supplementary Figure 1: <sup>1</sup>H NMR spectra of the compounds (1)–(6).

**Supplementary Table 1: List of primers used**

| <b>Primer name</b> | <b>T<sub>m</sub> [°C]</b> | <b>Primer sequence</b>                   |
|--------------------|---------------------------|------------------------------------------|
| AR-V7 forward      | 70                        | 5'-CCA TCT TGT CGT CTT CGG AAA TGT TA-3' |
| AR-V7 reverse      |                           | 5'-TTT GAA TGA GGC AAG TCA GCC TTT CT-3' |
| AR-FL forward      | 61                        | 5'-CAGTGGATGGGCTGAAAAAT-3'               |
| AR-FL reverse      |                           | 5'-GGAGCTTGGTGAGCTGGTAG-3'               |
| PSA forward        | 64                        | 5'-CAT CAG GAA CAA AAG CGT GA-3'         |
| PSA reverse        |                           | 5'-ATA TCG TAG AGC GGG TGT GG-3'         |
| FKBP5 forward      | 61                        | 5'-AGGAGGGAAGAGTCCCAGTG-3'               |
| FKBP5 reverse      |                           | 5'-TGGGAAGCTACTGGTTTTGC-3'               |
| TMPRSS2 forward    | 64                        | 5'-CAGGAGTGTACGGGAATGTGATGGT-3'          |
| TMPRSS2 reverse    |                           | 5'-GATTAGCCGTCTGCCCTCATTGT-3'            |
| UBE2C forward      | 57                        | 5'-TGGTCTGCCCTGTATGATGT-3'               |
| UBE2C reverse      |                           | 5'-AAAAGCTGTGGGGTTTTTCC-3'               |
| AKT1 forward       | 62                        | 5'-TGGACTACCTGCACTCGGAGAA-3'             |
| AKT1 reverse       |                           | 5'-GTGCCGCAAAGGTCTTCATGG-3'              |
| GAPDH forward      | 56                        | 5'-TGC ACC ACC AAC TGC TTA-3'            |
| GAPDH reverse      |                           | 5'-GAG GCA GGG ATG ATG TTC-3'            |
